# Annals of Oncology

Official Journal of the  
European Society for Medical Oncology

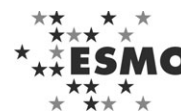

## Volume 17, 2006 Supplement 3

4<sup>th</sup> International Symposium on Targeted Anticancer Therapies (TAT 2006)

16–18 March, 2006: Amsterdam, The Netherlands

|                                                                                  |       |                     |                                                                |       |
|----------------------------------------------------------------------------------|-------|---------------------|----------------------------------------------------------------|-------|
| TAT 2006 sponsors & grants                                                       | iii4  | plenary session 6:  | promising agents targeting membrane receptors                  | iii26 |
| welcome to TAT 2006!                                                             | iii5  | plenary session 7:  | immunological targets and mechanisms                           | iii28 |
| MDICT Task Force: Methodology for the Development of Innovative Cancer Therapies | iii6  | plenary session 8:  | new technologies and new approaches to targeted cancer therapy | iii30 |
| committees                                                                       | iii7  | plenary session 11: | miscellaneous agents: preclinical and clinical studies         | iii31 |
| meeting schedule at a glance                                                     | iii8  | poster session 1:   | new drug targets, drug design and drug discovery               | iii34 |
| meeting schedule, Thursday, March 16                                             | iii9  | poster session 2:   | preclinical drug profiling                                     | iii37 |
| meeting schedule, Friday, March 17                                               | iii10 | poster session 3:   | molecular diagnosis, patient selection and prognosis           | iii42 |
| meeting schedule, Saturday, March 18                                             | iii15 | poster session 4:   | vaccines, monoclonal antibodies and other immunotherapies      | iii47 |
| <b>abstracts</b>                                                                 |       | poster session 5:   | phase I and II studies of new agents                           | iii49 |
| plenary session 1: opening and keynotes                                          | iii17 | poster session 6:   | post-registration clinical research                            | iii51 |
| plenary session 2: angiogenesis and vascular-targeting agents                    | iii20 | subject index       |                                                                | iii53 |
| plenary session 3: clinical trial design for targeted agents                     | iii21 | author index        |                                                                | iii55 |
| plenary session 4: targeting apoptosis                                           | iii23 |                     |                                                                |       |
| plenary session 5: promising agents targeting downstream signalling pathways     | iii24 |                     |                                                                |       |
